# Supplementary material for: Capacitance-soaring phenomenon induced by CuO electrode reconstruction with metastable Cu(OH)2 nanowires
Source: Royal Society of Chemistry journal article supplement (doi:10.1039/d3cc05960j), 2024-01-01
Supplement: d3cc05960j1.pdf [file d3cc05960j1.pdf]

1

## **Supporting Information**

2

### **Capacitance-soaring phenomenon induced by CuO electrode**

3

#### **reconstruction with metastable Cu(OH)<sub>2</sub> nanowires**

4

Jie Bai <sup>a,b</sup>, Zhenhuai Yang <sup>c\*</sup>, Qiang Wang <sup>a,b\*</sup>

5

<sup>a</sup> School of Aeronautics, Chongqing Jiaotong University, Chongqing 400074, P. R.

6

China

7

<sup>b</sup> Chongqing Key Laboratory of Green Aviation Energy and Power, The Green

8

Aerotechnics Research Institute of Chongqing Jiaotong University, Chongqing 401120,

9

P. R. China

10

<sup>c</sup> Laboratory of Microwave and Vacuum Technology, Jihua Laboratory, Foshan

11

528200, P. R. China

12

\* Corresponding authors: Qiang Wang and Zhenhuai Yang

13

Email: wangq@cqjtu.edu.cn (Q. Wang), yangzh@jihualab.ac.cn (Z. Yang)

14

Tel. / Fax: +86-023-47273962

15

Address: No.66 Xuefu Avenue, Nan'an District, Chongqing 400074 P.R. China

16

## **1. Experimental**

### **1.1. Synthesis**

19 The Cu foam used in the experiment was purchased from Kunshan Jiayisheng

20 Electronics Co. Ltd. Potassium hydroxide (KOH) pellets, anhydrous ethanol, and

21 deionized water were purchased from Harbin Baida Chemical Co. Ltd. Electrochemical

22 reactions, and the performance tests were conducted using an electrochemical

23 workstation (PGSTAT 302N) produced by Masson (China) Co. Ltd. Cu(OH)<sub>2</sub> nanowire

24 precursors were prepared through in-situ anodic oxidation on a Cu foam surface. A  
25 two-electrode system was used, with a Cu foam as the working electrode and Pt sheet  
26 as the counter and reference electrodes. Before the start of the experiment, the Cu foam  
27 (100 PPI, area  $1 \text{ cm}^2$ ), which was used as the Cu source and collector, was soaked in  
28 absolute ethanol and deionized water for ultrasonic cleaning for 15 min to remove  
29 impurities and pollutants from the surface. Then, the cleaned Cu foam was placed in  
30 deionized water for subsequent experiments. The KOH particles and deionized water  
31 were used to prepare a 3 M KOH aqueous solution as the electrolyte. The current  
32 density was  $30 \text{ mA cm}^{-2}$ , and the duration of the electrochemical reaction was 20 min.  
33 The prepared  $\text{Cu}(\text{OH})_2$  nanowire electrode was immersed in absolute ethanol and  
34 deionized water five times before being dried in an oven at  $60 \text{ }^\circ\text{C}$  for 120 min. The  
35 experiments on the transformation of the  $\text{Cu}(\text{OH})_2$  nanowire precursors to CuO  
36 nanosheets were performed using a three-electrode system for electrochemical  
37 reactions. A Cu foam aggregate with  $\text{Cu}(\text{OH})_2$  nanowires grown on the surface was  
38 used as the working electrode. A Pt plate, saturated calomel electrode, and 3 M KOH  
39 aqueous solution were used as the counter electrode, reference electrode, and electrolyte  
40 for the electrochemical reaction, respectively. After 1,500 cyclic voltammetry (CV)  
41 cycles, the  $\text{Cu}(\text{OH})_2$  nanowire precursor was completely transformed into  
42 interconnected CuO nanosheets; that is, a composite electrode composed of CuO  
43 nanosheets and Cu foam was obtained.

## 44 **1.2. Characterization**

45 The surface morphology and microstructure of the synthesized samples were  
46 characterized by field-emission scanning electron microscopy (FEI Helios Nanolab  
47 600i, operated at 5–20 kV) and transmission electron microscopy (FEI Tecnai G2 F30,  
48 operated at 300 kV). The crystal structures and chemical compositions of the prepared  
49 samples were characterized using X-ray diffraction (X' Pert Pro MRD) and X-ray  
50 photoelectron spectroscopy (Escalab 250Xi).

### 51 **1.3. Electrochemical measurement**

52 An electrochemical workstation (PGSTAT 302N, Metrohm Autolab B.V., the  
53 Netherlands) with a three-electrode cell was used for CV and galvanostatic charge–  
54 discharge (GCD) analyses at room temperature. The fabricated samples, Pt foil, and  
55 calomel acted as the working, counter, and reference electrodes, respectively, and a 6  
56 M KOH aqueous solution was used as the electrolyte. The CV test was conducted at a  
57 potential window of 0.6 V and scan rate from 10–500 mV s<sup>-1</sup>. The GCD test was  
58 conducted at current densities in the range 10–100 mA cm<sup>-2</sup>. The 1,500 CV cycles of  
59 the prepared Cu(OH)<sub>2</sub> nanowire electrode were conducted at scan rate of 50 mV s<sup>-1</sup> in  
60 a three-electrode system.

61 The specific capacitance ( $C_a$ ; F cm<sup>-2</sup>) of the electrode according to the CV curves  
62 at different scan rate was calculated using Eq. (1):

$$63 \quad C_a = \frac{\int IdV}{2\nu S\Delta V} \quad (1)$$

64 where  $I$  (A) is the response current,  $V$  (V) is the potential, and  $\nu$  (mV s<sup>-1</sup>),  $S$  (cm<sup>-</sup>  
65 <sup>2</sup>), and  $\Delta V$  (V) represent the scan rate, surface area of the electrode, and potential

66 window, respectively. The areal capacitance ( $C_A$ ; F cm<sup>-2</sup>) was calculated from GCD  
67 curves using Eq. (2):

$$C_A = \frac{I \int V dt}{S \Delta V^2} \quad (2)$$

68  
69 where  $I$  (A) is the discharge current,  $V$  (V) is the potential,  $t$  (s) is the discharge  
70 time,  $S$  (cm<sup>2</sup>) is the electrode surface area, and  $\Delta V$  (V) is the working potential.

## 71 2. CuO nanosheets prepared without copper hydroxide nanowire precursors

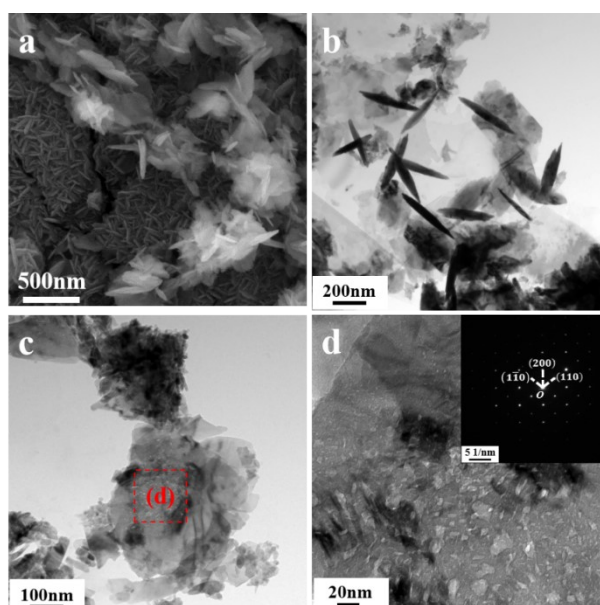

72 **Fig. S1** (a) SEM image of CuO nanosheets prepared without copper hydroxide  
73 nanowire precursors. (b) TEM image of CuO nanosheets prepared without copper  
74 hydroxide nanowire precursors. (c) TEM image of fragment of prepared CuO  
75 nanosheet. (d) High-magnification TEM image of a CuO nanosheet fragment (inset is  
76 SAED image of the CuO nanosheet fragment in (c)).

77 The SEM image of CuO crystals obtained after 1500 CV cycles with copper foam base  
78 and copper source in a three-electrode system were shown in Fig. S1a. An elliptical  
79 vertical basis-oriented nanosheet structure is formed on the surface of the copper foam.

80 The nanosheets interlace with each other at different angles to form a three-dimensional  
81 network structure, which provides a large specific surface area for the diffusion of  
82 electrolyte ions and the transport of reactive substances. At sites with higher reactivity  
83 and local locations with higher ion concentration, the nanosheets were stacked with  
84 each other to form porous microspherical clusters. The nanosheets were wrapped  
85 around each other, and the diameter of the clusters was approximately 500 nm. Fig.  
86 S1b–d shows the TEM diagram of CuO nanosheet electrode prepared without Cu(OH)<sub>2</sub>  
87 nanowire precursors. Fig. S1b indicates that the surface of the electrode prepared  
88 without Cu(OH)<sub>2</sub> nanowire precursors is composed of two structures, one is an elliptical  
89 nanosheet stacked on top of each other, and the other is a spindle shaped structure. The  
90 selected area in the red box in Fig. S1c is a part of the elliptic nanosheet fragment, and  
91 the structure as shown in Fig. S1d is obtained after several cycles of magnification. A  
92 large number of holes with a diameter of approximately 2–10 nm is distributed on the  
93 surface of the nanosheet, and the existence of these holes is conducive to the passage  
94 of electrolyte ions. The illustration shows the diffraction spots of the nanoparticle. The  
95 diffraction spots of the regular arrangement indicate that the nanoparticle is a single  
96 crystal. However, because the nanoparticle is carved by holes of different sizes, the  
97 image of the boundary is not clear. Therefore, without Cu(OH)<sub>2</sub> nanowire precursors,  
98 CuO nanosheets can also be generated through CV cycle treatment, whose structure is  
99 perpendicular to the base and cross-linked with each other. Further, there is a large  
100 number of nanoholes on the surface of the generated CuO nanosheets. This multi-level

101 micro-/nanostructure increases the contact area with the electrolyte and is expected to  
102 yield better electrochemical energy storage capacity.

103

104

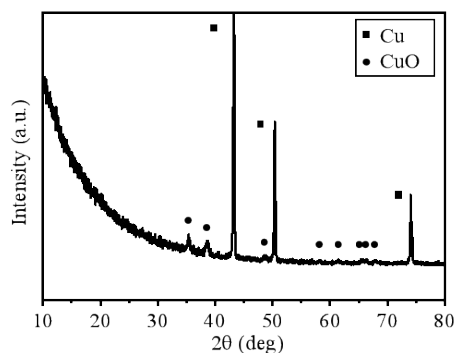

105 **Fig. S2** XRD pattern of CuO nanosheets prepared without copper hydroxide nanowire  
106 precursors.

107 To clarify the crystal structure and phase composition of the electrode surface, XRD  
108 tests were conducted on the prepared electrode; the results are shown in Fig. S2. In  
109 addition to the diffraction peak of Cu indicated using a square symbol, the diffraction  
110 peak of CuO, indicated using a circular symbol, was also found. Moreover, no other  
111 crystal phase containing copper oxides or hydroxides was found, indicating the high  
112 purity of the prepared electrode. The  $2\theta$  values of  $35.3^\circ$ ,  $38.5^\circ$ ,  $48.7^\circ$ ,  $58.3^\circ$ ,  $61.4^\circ$ ,  
113  $65.6^\circ$ ,  $66.3^\circ$  and  $67.9^\circ$  correspond to the diffraction peaks observed in the CuO crystals,  
114 namely, (002), (111), (202), (202), (113), (022), (311), and (113) crystal planes (PDF  
115 card #45-0937), respectively; this indicates the presence of CuO phase in the prepared  
116 electrode and good crystallinity.

117

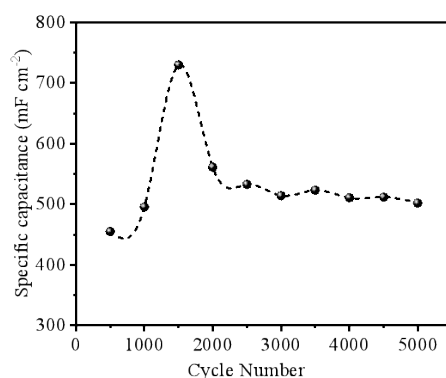

118 **Fig. S3** Area-specific capacitance of CuO electrode prepared without copper hydroxide  
119 nanowire precursors after different CV cycle number at current density of 60 mA cm<sup>-2</sup>.  
120 As shown in Fig. S3, the area-specific capacitance of the CuO nanosheet electrode  
121 prepared without precursors first increases and then decreases as the number of CV  
122 cycles increases. After approximately 1,500 CV cycles, the area specific capacitance  
123 reaches a maximum of about 730 mF cm<sup>-2</sup>, which is higher than the area specific  
124 capacitance (608 mF cm<sup>-2</sup>) of CuO nanosheet electrodes prepared with Cu(OH)<sub>2</sub>  
125 nanowire precursors after 1500 CV cycles. This result may be attributed to the relatively  
126 high quality of CuO nanosheet crystals grown without precursors, which is consistent  
127 with the results of XRD tests. However, the capacitance-soaring phenomenon is not  
128 observed in the CuO nanosheet electrode prepared without Cu(OH)<sub>2</sub> nanowire  
129 precursors.

130

131

132

133

134

135 **3. CuO nanosheet electrode after 10,000 charge–discharge cycles**

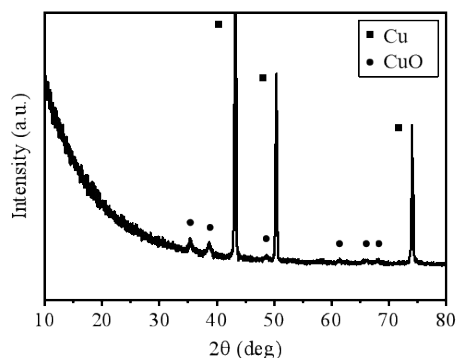

136 **Fig. S4** XRD pattern of CuO nanosheet electrode after 10,000 charge–discharge cycles.

137

138 Fig. S4 shows the XRD pattern of the CuO nanosheet electrode prepared with  $\text{Cu}(\text{OH})_2$

139 nanowire precursors after 10,000 charge–discharge cycles at a current density of 60 mA

140  $\text{cm}^{-2}$ . As shown in Fig. S4, after 10,000 charge–discharge cycles, the electrode mainly

141 contained Cu and CuO, and no crystal phase of other types of cupric oxide or hydroxide

142 was found. The  $2\theta$  values of  $35.3^\circ$ ,  $38.5^\circ$ ,  $48.7^\circ$ ,  $61.4^\circ$ ,  $66.3^\circ$ , and  $67.9^\circ$  correspond to

143 the diffraction peaks observed in CuO crystals, namely, (002), (111), (202), (113),

144 (311), and (113) crystal planes, respectively (PDF card #45-0937), indicating the high

145 purity of the CuO nanosheet electrode after 10,000 charge–discharge cycles.

146

147

148

149

150



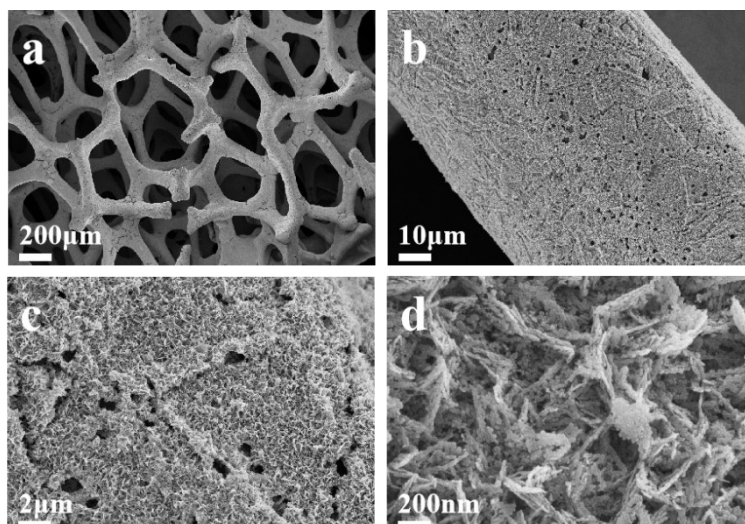

151 **Fig. S5** SEM images of CuO nanosheet electrode prepared with Cu(OH)<sub>2</sub> nanowire  
152 precursors after 10,000 CV cycles at current density of 60 mA cm<sup>-2</sup>. (a) Low-  
153 magnification SEM image. (b) SEM image of electrode skeleton. (c) SEM image of  
154 nanosheets. (d) High-magnification SEM image of nanosheets.

155 Surface morphology of the CuO nanosheet electrode after 10,000 charge–discharge  
156 cycles was characterized via SEM (Fig. S5). Fig. S5a shows that the electrode foam  
157 skeleton remains intact after 10,000 CV cycles. As shown in Figs. S5b and S5c,  
158 numerous pores are formed by CuO active substances on the electrode surface, and the  
159 nanosheet structures are also corroded into a large number of fragments (Fig. S5d); this  
160 is conducive to the infiltration of the electrolyte. However, the internal ion transport  
161 network channel is damaged. This is probably why after 10,000 charge–discharge  
162 cycles and with the electrode area ratio capacitance continuously increasing to nearly  
163 3.2 times of the initial value, the capacitance finally begins to decay.
